# Supplementary material for: Insular Organization of Gene Space in Grass Genomes
Source: PLoS One. 2013 Jan 11;8(1):e54101. doi: 10.1371/journal.pone.0054101 (PMC3543359; doi:10.1371/journal.pone.0054101)
Supplement: Table S4 — Locations of genes in the S. bicolor regions orthologous to nine Ae. tauschii contigs and distances between neighboring S. bicolor genes. (XLSX) [file pone.0054101.s004.xlsx]

## Sheet: Sheet1
Supplementary Table 4. Location of genes in the S. bicolor regions orthologous to nine Ae. tauschii contigs and distances between neighboring S. bicolor genes
Orthologous Ae. tauschii contig	Gene number1	Gene ID	Start gene (bp)	End gene (bp)	Intergenic distance
ctg13936	1	Sb01g043980	67102691	67105356	0.5
	2	Sb01g043970	67096808	67102220	9.3
	4	Sb01g043960	67084597	67087519	10.5
	7	Sb01g043950	67073183	67074121
ctg13938	1a	Sb01g035920	59552057	59552581	23.8
	1b	Sb01g035900	59527745	59528296	1.2
	2	Sb01g035890	59518956	59526539	9.6
	3	Sb01g035880	59507345	59509352	9.3
	4	Sb01g035870	59485074	59498006	21
	5	Sb01g035860	59461527	59464055	3.1
	6	Sb01g035850	59452862	59458469	2.2
	7	Sb01g035840	59447155	59450639	5.4
	8a	Sb01g035830	59440591	59441758	4.1
	9	Sb01g035820	59436241	59436519	1.1
	8c	Sb01g035810	59434320	59435181	2.9
	10	Sb01g035800	59429386	59431458	9.2
	11	Sb01g035780	59417542	59420141
ctg3466	1	Sb01g044720	67888947	67891550	10.8
	2	Sb01g044730	67902375	67904294	3
	3	Sb01g044740	67907263	67916639	3.7
	4	Sb01g044750	67920377	67928241	4.4
	5	Sb01g044760	67932593	67935132	0.3
	6a	Sb01g044770	67935382	67938458	2.7
	7	Sb01g044780	67941110	67943230	1
	6b	Sb01g044785	67944203	67945219	1.4
	8	Sb01g044790	67946657	67952076	5
	9	Sb01g044800	67957063	67961885	8.9
	11	Sb01g044810	67970813	67981206	0.7
	12	Sb01g044820	67981927	67986883	15
	14	Sb01g044830	68001888	68006408
ctg6274	1	Sb06g04500	10109470	10113522
ctg4985	1	Sb02g000840	682141	683331	5.1
	2	Sb02g000830	674529	677028	0.3
	6	Sb02g000820	672320	674242	0.8
	8	Sb02g000810	661375	671560	-
	9	Sb02g001100	976712	977984	1.2
	10	Sb02g001110	979157	985611	25.9
	11a	Sb02g001130	1011500	1012003	0.1
	11b	Sb02g001135	1012060	1012254	1.9
	11c	Sb02g001140	1014195	1016073	13.2
	13	Sb02g001160	1029227	1029597
ctg5622	1	Sb06g023320	52492372	52496826	4.6
	2	Sb06g023330	52501438	52508469	9
	3	Sb06g023350	52517466	52518917	0.6
	4	Sb06g023360	52519477	52522054	1.2
	5	Sb06g023365	52523279	52523503	0.7
	6	Sb06g023370	52524227	52525751	4.1
	7	Sb06g023380	52529834	52535888	0.8
	8	Sb06g023390	52536678	52540786	3
	9	Sb06g023400	52543795	52546982	15.2
	10	Sb06g023405	52562201	52562532	0.8
	11	Sb06g023410	52563362	52566503	0.3
	12	Sb06g023420	52566767	52569951	0.7
	13	Sb06g023430	52570656	52574027	10.4
	14	Sb06g023440	52584475	52588359	1.1
	15	Sb06g023450	52589430	52593155	2.6
	17	Sb06g023460	52595770	52596798	4.4
	18	Sb06g023480	52601232	52603231
ctg5080	3	Sb08g001710	1717743	1722003	0.5
	4	Sb08g001720	1722476	1726145	0.9
	5	Sb08g001730	1727012	1730212	0.9
	7	Sb08g001740	1731137	1731622	24.3
	9	Sb08g001780	1755888	1757742	2.5
	10	Sb08g001790	1760241	1764616	36
	11	Sb08g001800	1800642	1801601	11.1
	12	Sb08g001810	1812730	1814559
ctg5748	1	Sb04g005200	5055899	5058423	0.2
	2	Sb04g005190	5054708	5055661	1.7
	3	Sb04g005185	5049214	5053032	6.9
	4	Sb04g005180	5039031	5042361
ctg14250	2	Sb03g005240	5463448	5468454	1.2
	4a	Sb03g005250	5469629	5471002
1 Gene number as published in [24]
